# Supplementary material
Source: Springer Nature journal article supplement (https://www.springermedizin.de/resource/supplementary/13256_2011_1912_MOESM1_ESM.pdf/9648702)

Thyroid  
function

3  
2  
1

TSH ( $\mu$ IU/mL)  
fT4 (ng/dL)

Delusion and  
Hallucination

chlorpromazine

haloperidol

37.5mg

6mg

March

April

May

June

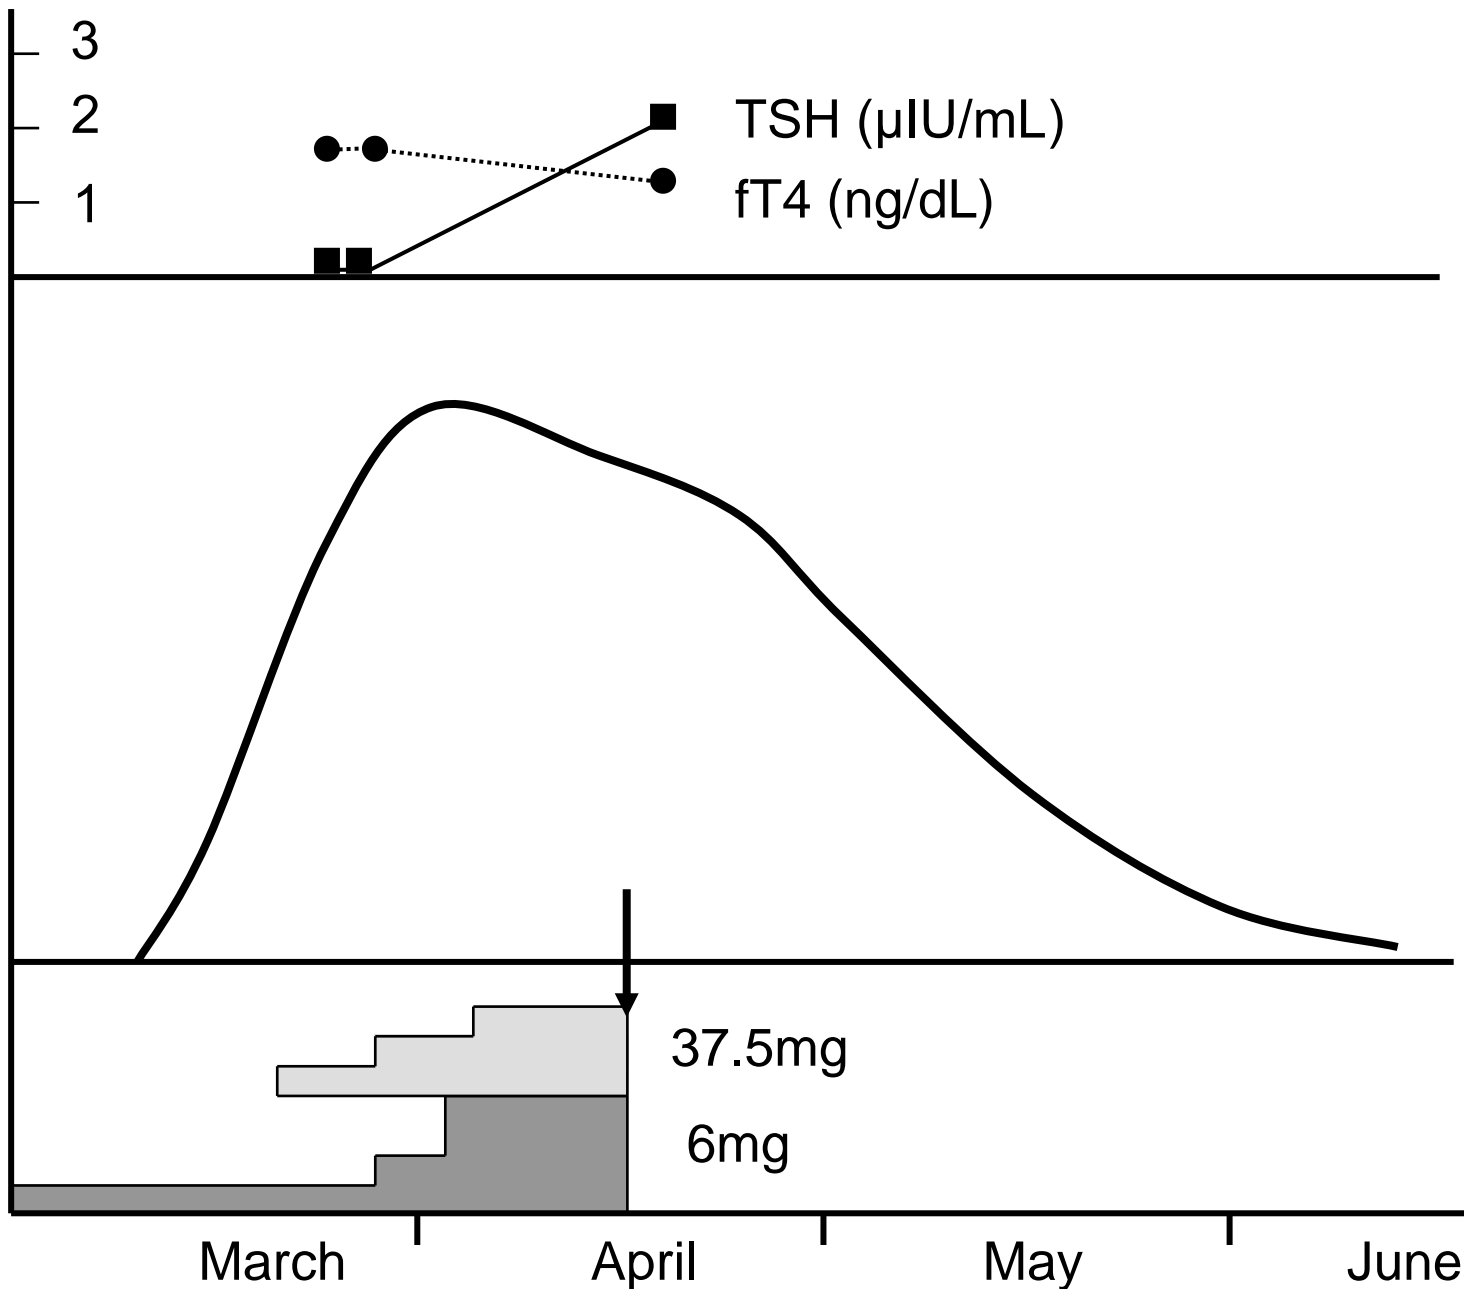

Supplement: MOESM1 [file 9648702]
